# Supplementary material for: Methylation of softwood and hardwood kraft lignins with chloromethane
Source: Royal Society of Chemistry journal article supplement (doi:10.1039/d3ra08404c), 2024-01-01
Supplement: d3ra08404c1.pdf [file d3ra08404c1.pdf]

## SUPPORTING INFORMATION FILE

### Methylation of softwood and hardwood kraft lignins with chloromethane

Daniel Beaudoin,\* Ernest Palus, Mohan Konduri and Alain Gagné

FPIinnovations, Bioproducts Innovation Centre of Excellence  
570 Saint-Jean Boulevard, Pointe-Claire, Québec, Canada, H9R 3J9

\*Corresponding author. E-mail: [daniel.beaudoin@fpinnovations.ca](mailto:daniel.beaudoin@fpinnovations.ca)

#### Table of Content

|   |                                                                   |   |
|---|-------------------------------------------------------------------|---|
| 1 | Molar mass distributions of methylated kraft lignin samples ..... | 2 |
| 2 | DSC thermograms.....                                              | 3 |
| 3 | <sup>31</sup> P NMR spectra.....                                  | 4 |
| 4 | <sup>1</sup> H NMR spectra .....                                  | 5 |
| 5 | <sup>13</sup> C NMR spectra .....                                 | 6 |
| 6 | FTIR spectra .....                                                | 8 |

# 1 Molar mass distributions of methylated kraft lignin samples

**Table S1.** Average molar mass of methylated kraft lignin isolated during the optimization using chloromethane (0.5-g scale, 40 psi CH<sub>3</sub>Cl).

| Entry             | Lignin | NaOH (mmol/g) | Temperature (°C) | Time (h) | H <sub>2</sub> O (mL/g) | Average molar mass        |                           |                         |                         |
|-------------------|--------|---------------|------------------|----------|-------------------------|---------------------------|---------------------------|-------------------------|-------------------------|
|                   |        |               |                  |          |                         | M <sub>w</sub> (SEC-MALS) | M <sub>n</sub> (SEC-MALS) | M <sub>w</sub> (SEC-RI) | M <sub>n</sub> (SEC-RI) |
| -                 | SKL    | -             | -                | -        | -                       | 15130                     | 4440                      | 7800                    | 1670                    |
| -                 | HKL    | -             | -                | -        | -                       | 8100                      | 2210                      | 4880                    | 910                     |
| 1                 | SKL    | 5             | 80               | 4        | 20                      | 19660                     | 7460                      | 6640                    | 1930                    |
| 2                 | SKL    | 5             | 90               | 4        | 20                      | 26100                     | 7400                      | 9350                    | 2050                    |
| 3                 | SKL    | 5             | 100              | 4        | 20                      | 28580                     | 8820                      | 9460                    | 2170                    |
| 4                 | SKL    | 5             | 110              | 4        | 20                      | 37650                     | 9670                      | 13310                   | 2260                    |
| 5                 | SKL    | 6             | 90               | 4        | 20                      | 18870                     | 6360                      | 10080                   | 1340                    |
| 6                 | SKL    | 6             | 100              | 4        | 20                      | 26800                     | 6760                      | 9640                    | 2140                    |
| 7                 | SKL    | 6             | 110              | 4        | 20                      | 36550                     | 8300                      | 11590                   | 2310                    |
| 8                 | SKL    | 6             | 110              | 3        | 20                      | 27600                     | 7160                      | 11170                   | 2070                    |
| 9                 | SKL    | 7             | 90               | 4        | 20                      | 20730                     | 7260                      | 11480                   | 1400                    |
| 10                | SKL    | 7             | 110              | 3        | 20                      | 27300                     | 7970                      | 15100                   | 1900                    |
| 11                | SKL    | 6             | 90               | 4        | 10                      | 20000                     | 7540                      | 10800                   | 1730                    |
| 12                | SKL    | 6             | 90               | 4        | 8                       | 23200                     | 7720                      | 11400                   | 1470                    |
| 13                | SKL    | 7             | 90               | 4        | 10                      | 21200                     | 7480                      | 10870                   | 1460                    |
| 14 <sup>[a]</sup> | SKL    | 7             | 90               | 4        | 9                       | 21100                     | 5500                      | 8400                    | 1490                    |
| 15 <sup>[a]</sup> | HKL    | 7             | 90               | 4        | 9                       | 11300                     | 3440                      | 5280                    | 720                     |
| 16 <sup>[b]</sup> | SKL    | 8             | 110              | 4        | 10                      | 15100                     | 4320                      | 8330                    | 1680                    |

<sup>[a]</sup> 100-g scale. <sup>[b]</sup> Reaction done in the absence of CH<sub>3</sub>Cl.

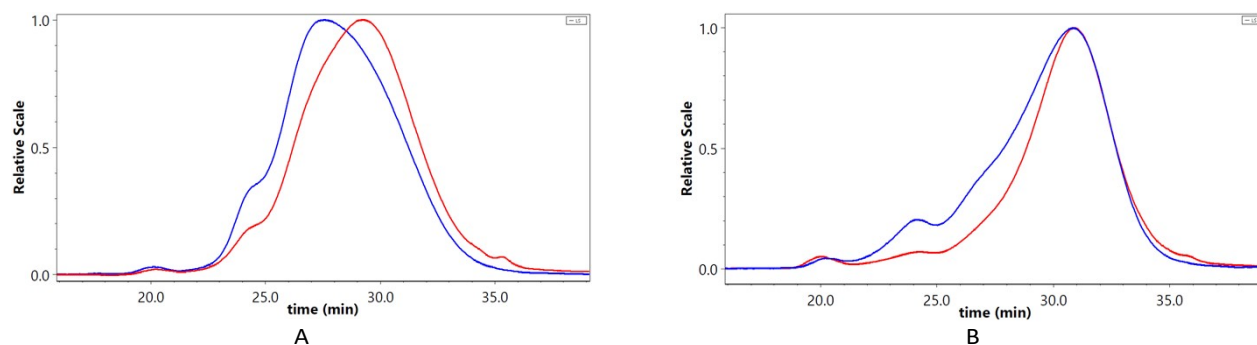

**Figure S1.** SEC-MALS profiles of A) SKL (red) and methylated SKL (blue) and of B) HKL (red) and methylated HKL (blue).

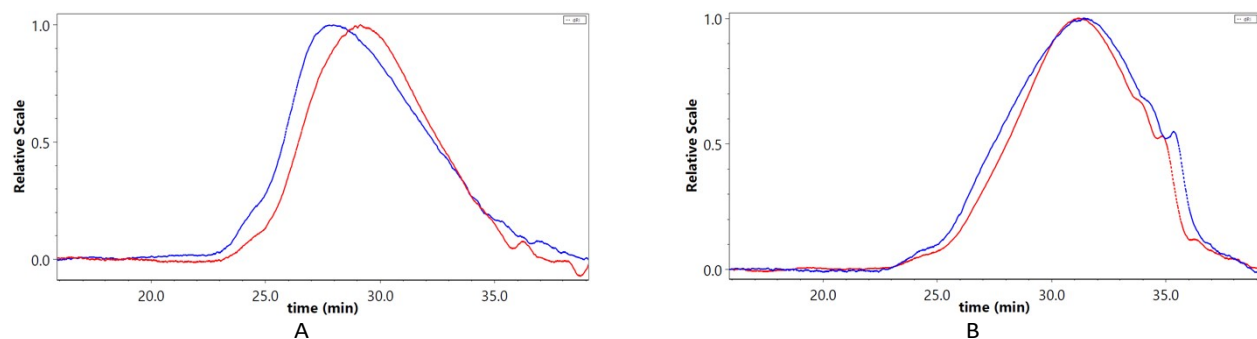

**Figure S2.** SEC-RI profiles of A) SKL (red) and methylated SKL (blue) and of B) HKL (red) and methylated HKL (blue).

## 2 DSC thermograms

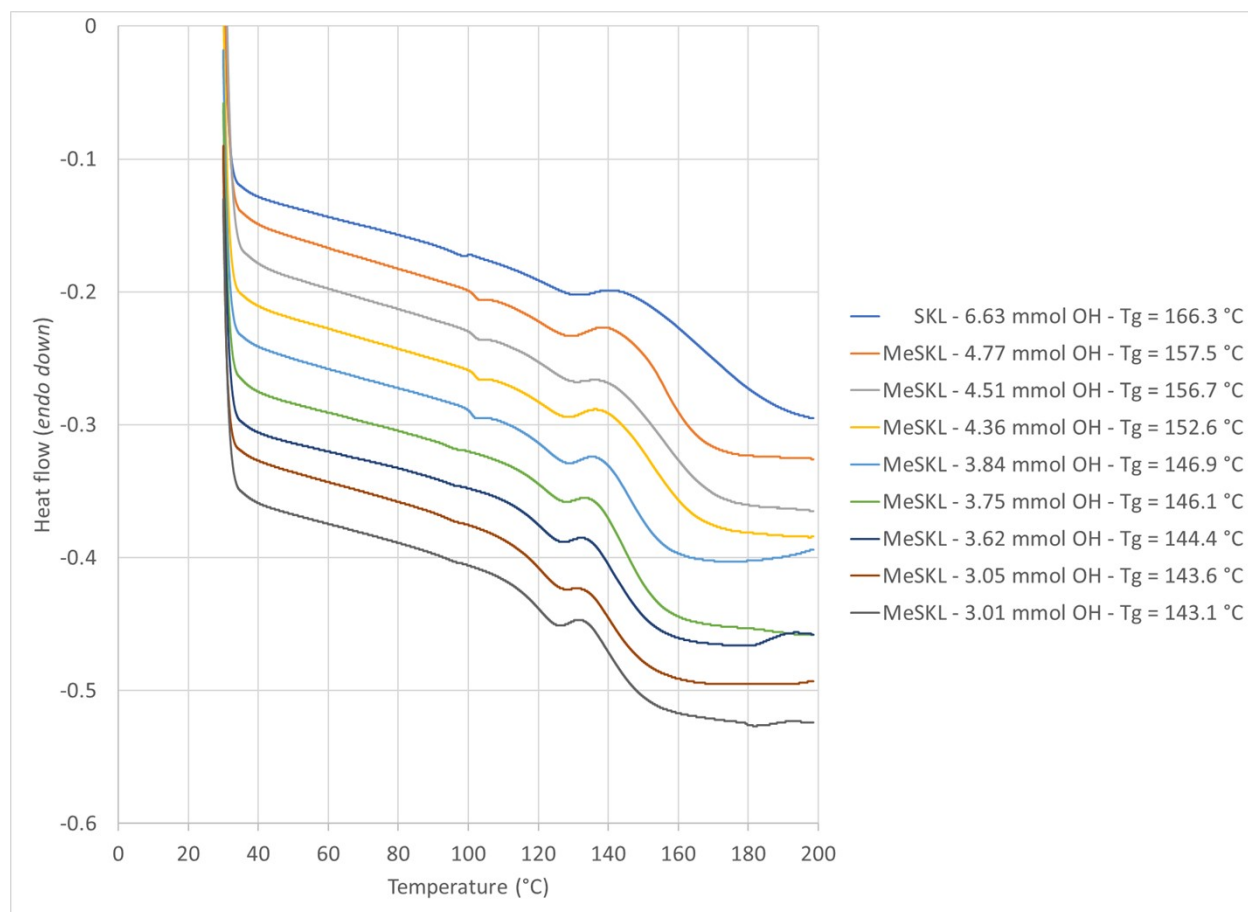

**Figure S3.** DSC thermograms of SKL and of various methylated SKL samples.

### 3 $^{31}\text{P}$ NMR spectra

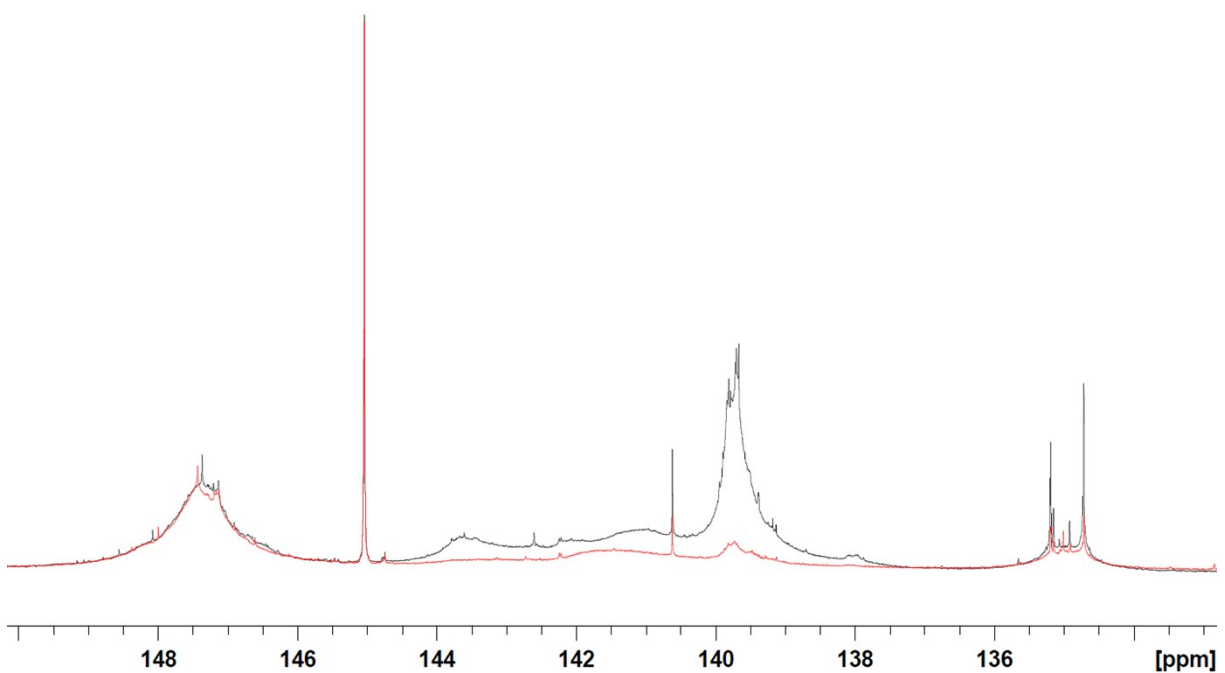

Figure S4.  $^{31}\text{P}$  NMR spectra of SKL (black) and of methylated SKL (red).

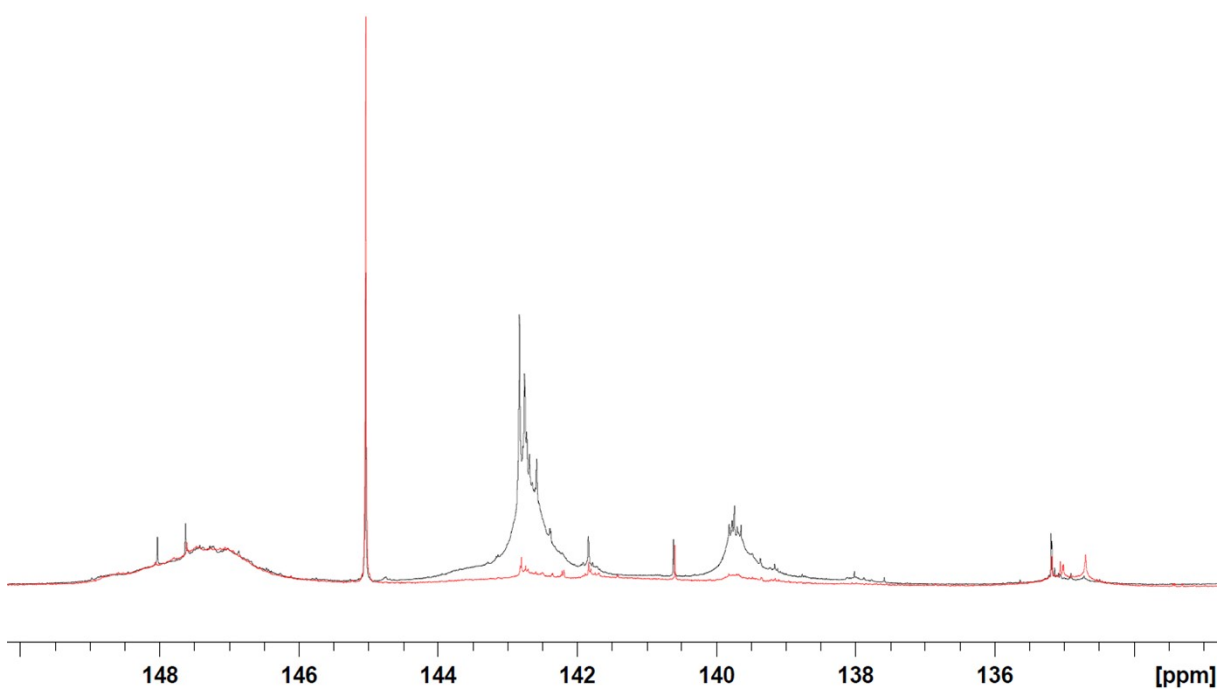

Figure S5.  $^{31}\text{P}$  NMR spectra of HKL (black) and of methylated HKL (red).

#### 4 $^1\text{H}$ NMR spectra

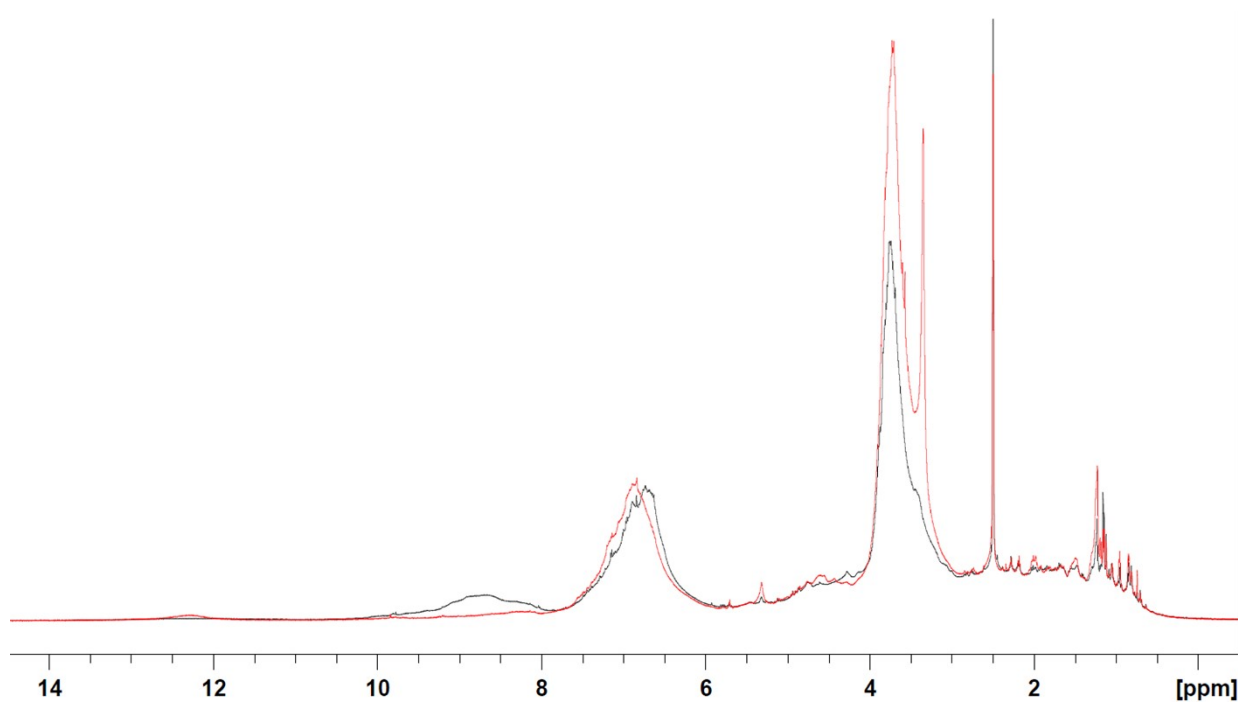

Figure S6.  $^1\text{H}$  NMR spectra of SKL (black) and of methylated SKL (red).

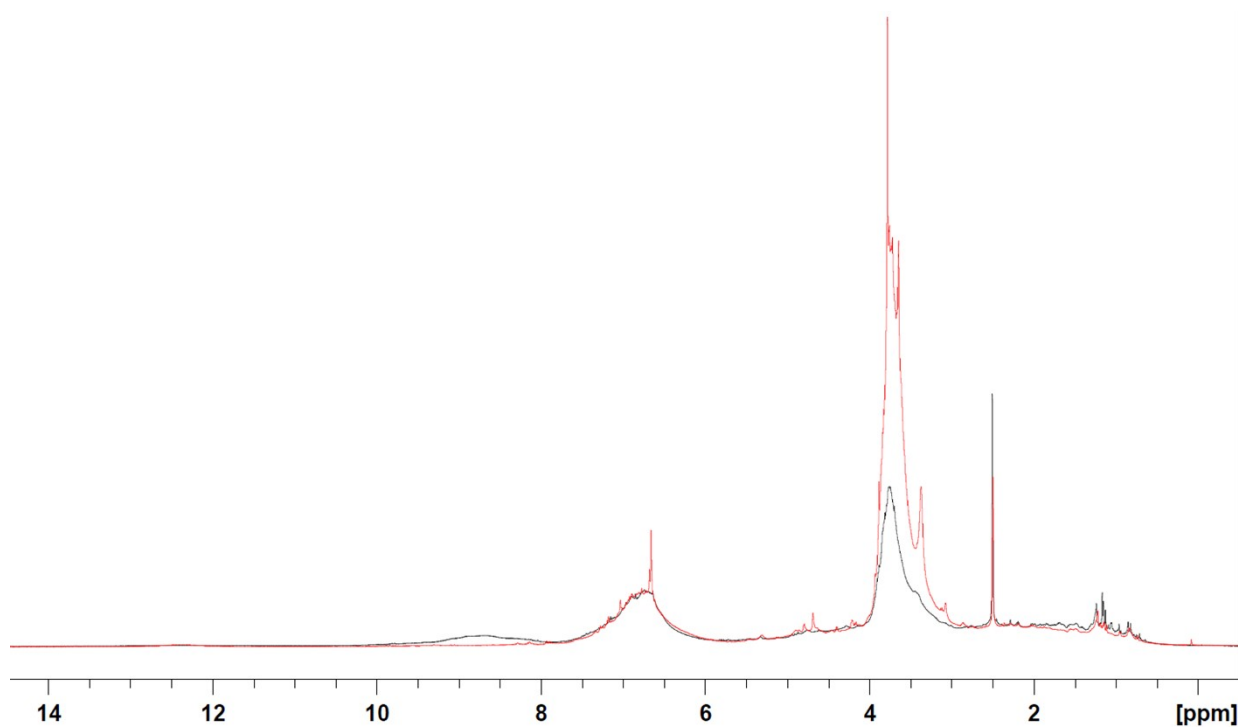

Figure S7.  $^1\text{H}$  NMR spectra of HKL (black) and of methylated HKL (red).

## 5 $^{13}\text{C}$ NMR spectra

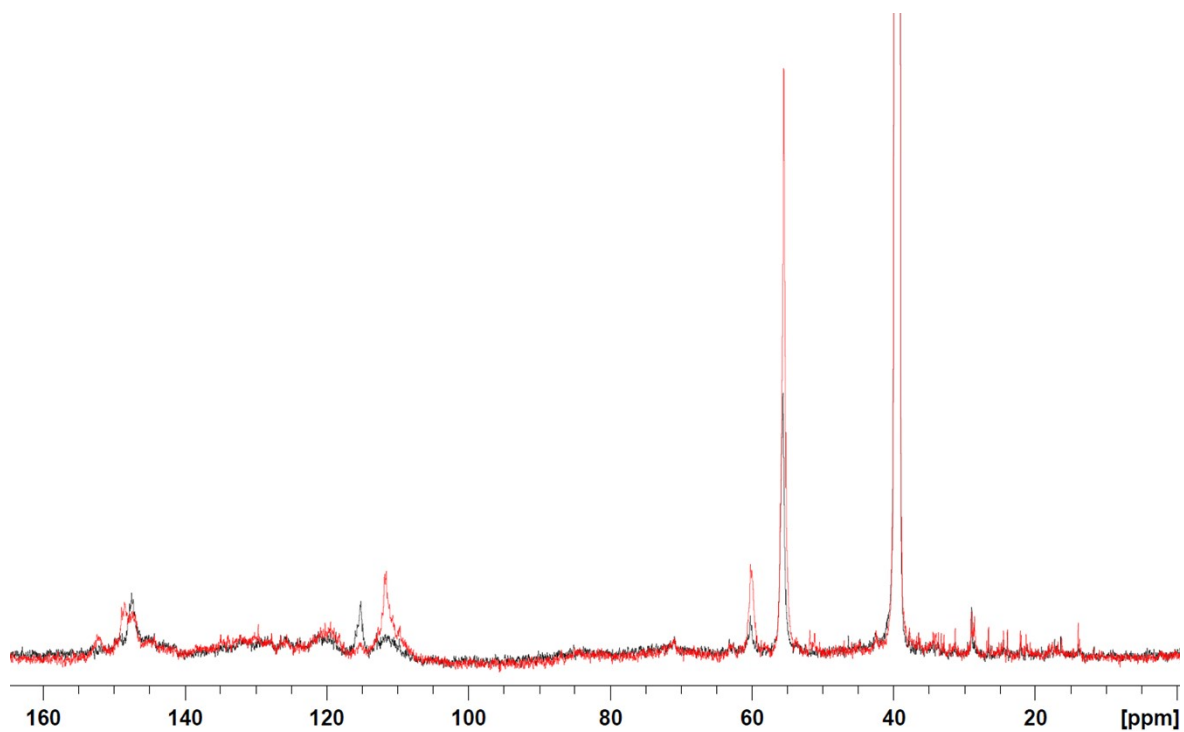

Figure S8.  $^{13}\text{C}$  NMR spectra of SKL (black) and of methylated SKL (red).

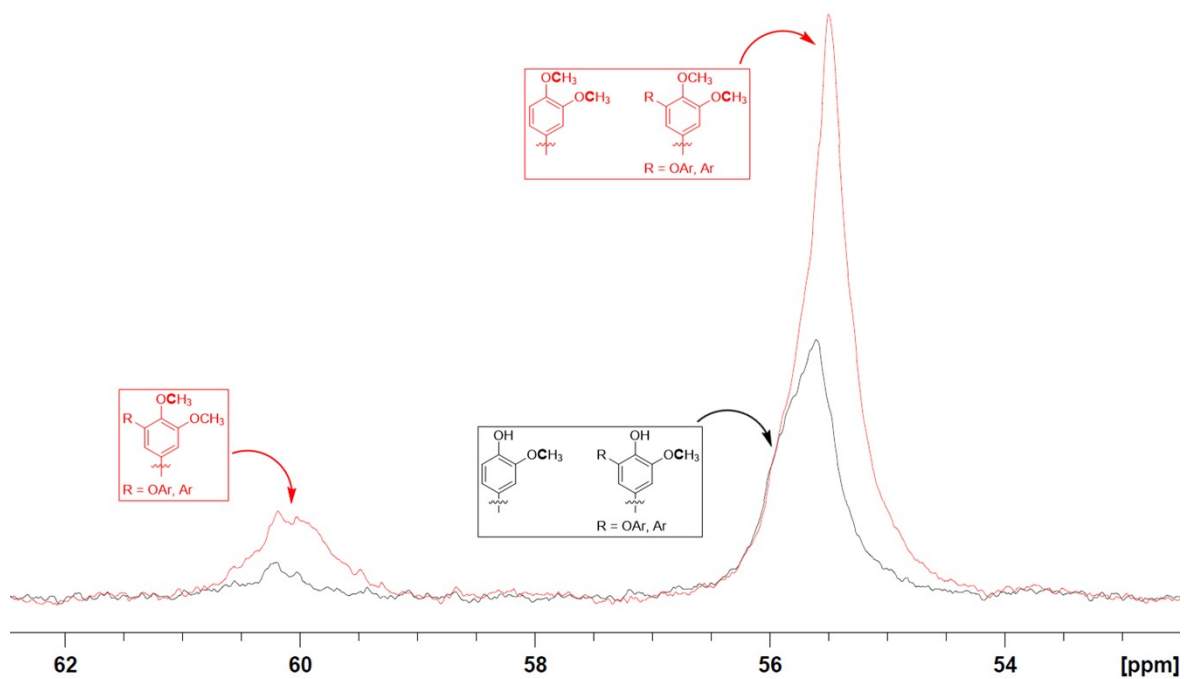

Figure S9. Zoomed fraction of the  $^{13}\text{C}$  NMR spectra of SKL (black) and of methylated SKL (red) with carbon assignments.

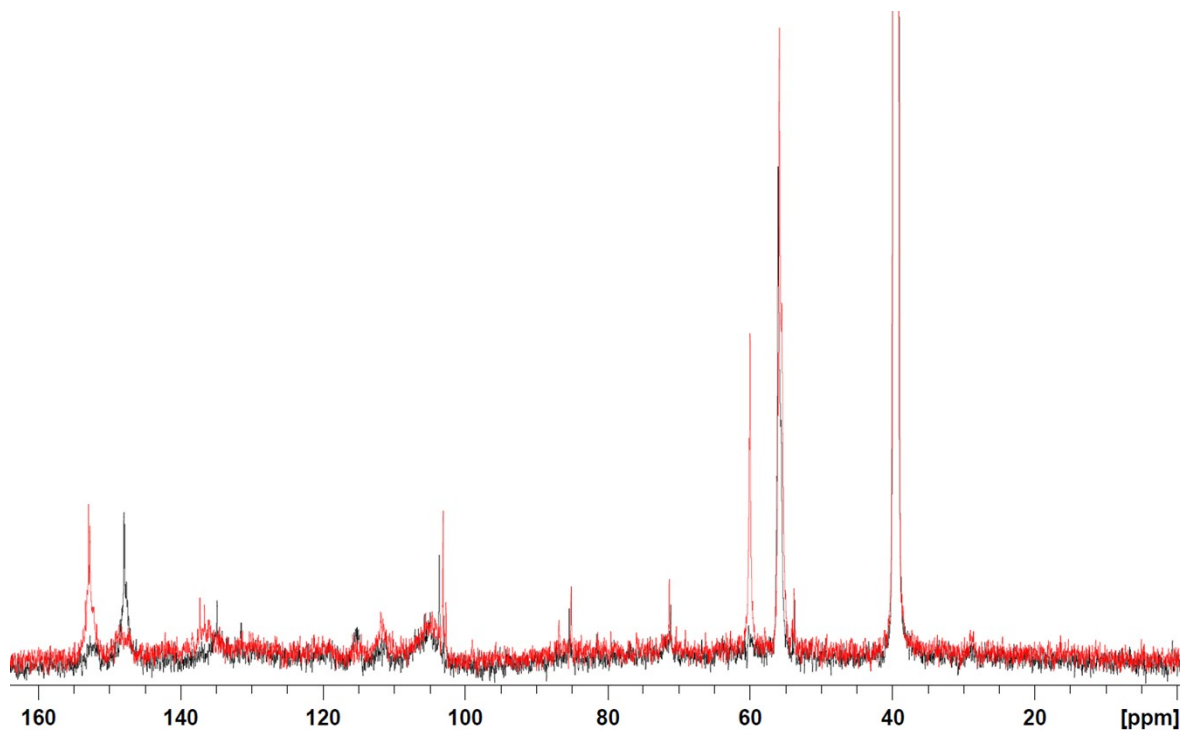

Figure S10.  $^{13}\text{C}$  NMR spectra of HKL (black) and of methylated HKL (red).

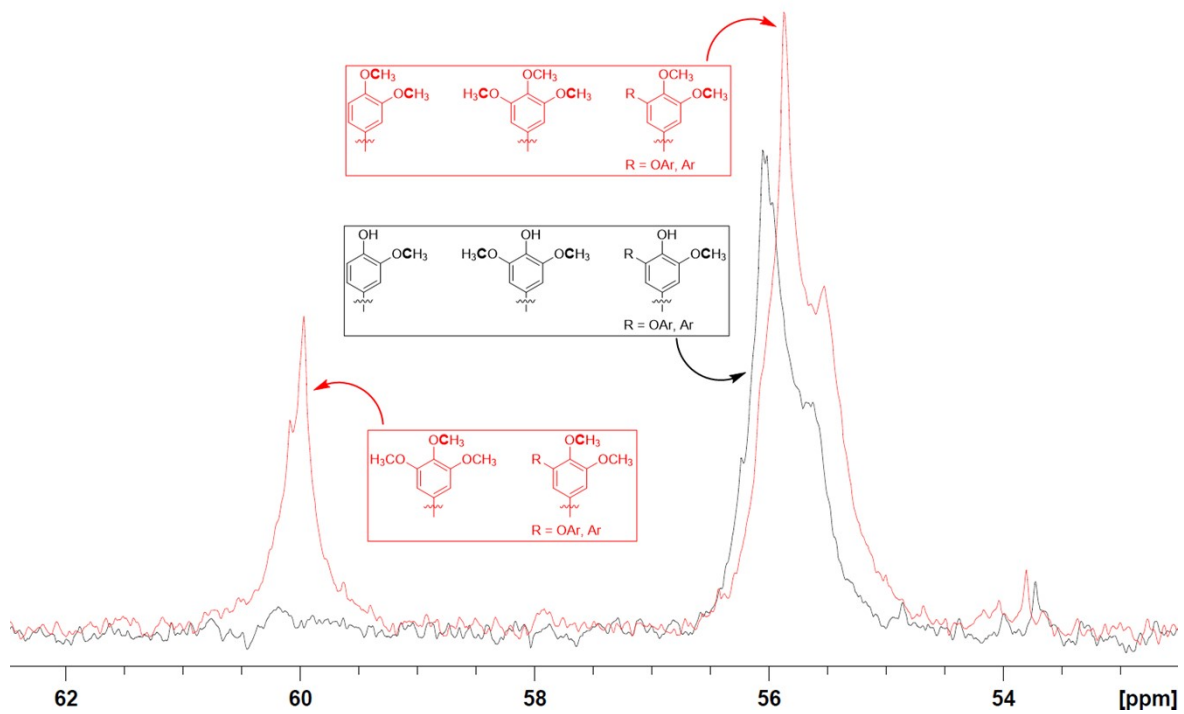

Figure S11. Zoomed fraction of the  $^{13}\text{C}$  NMR spectra of HKL (black) and of methylated HKL (red) with carbon assignments.

## 6 HSQC NMR spectra

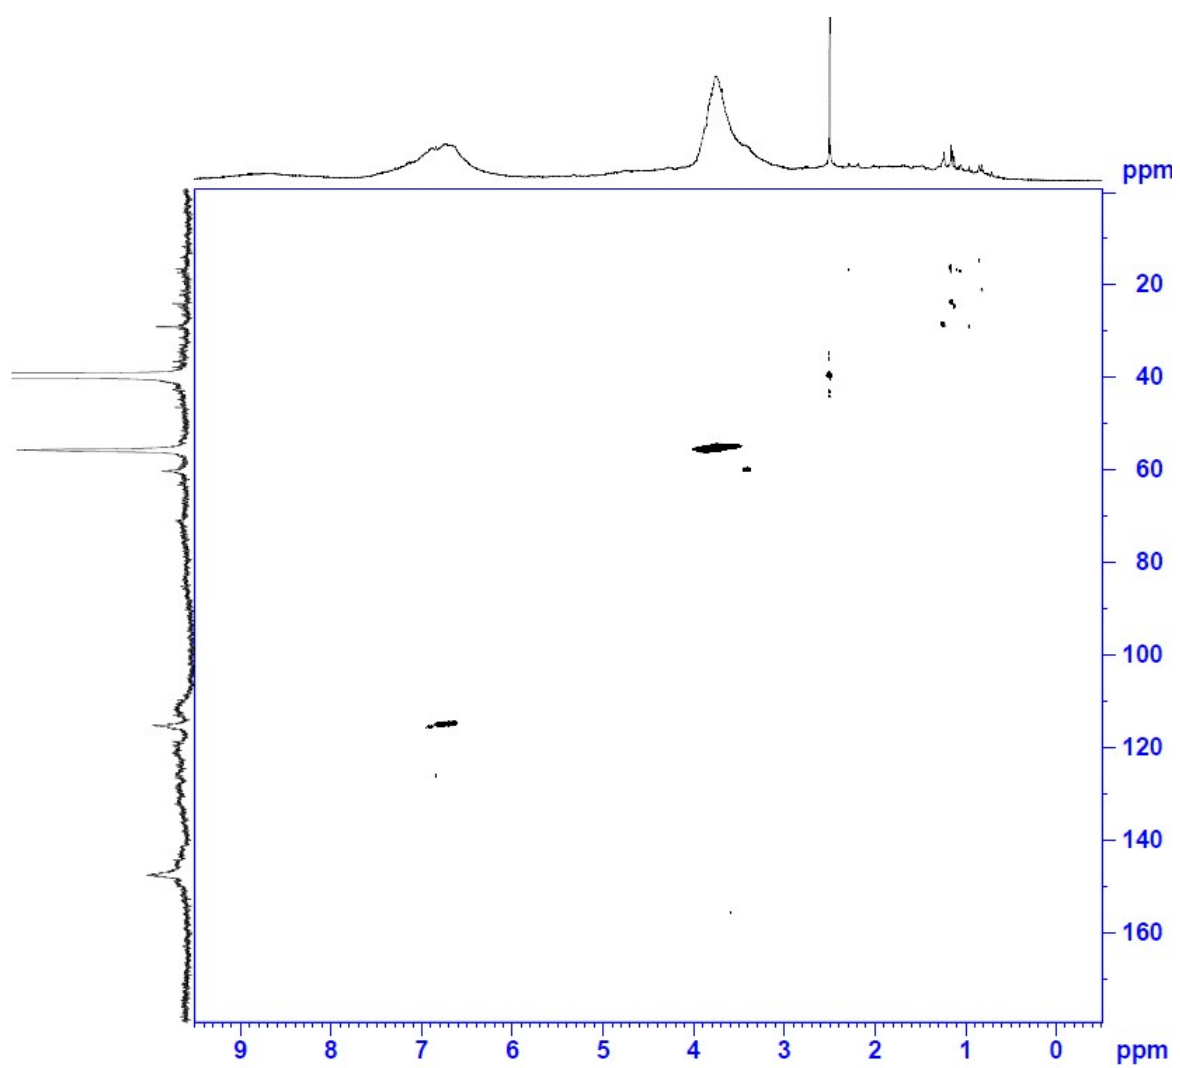

**Figure S12.** HSQC NMR spectra of SKL.



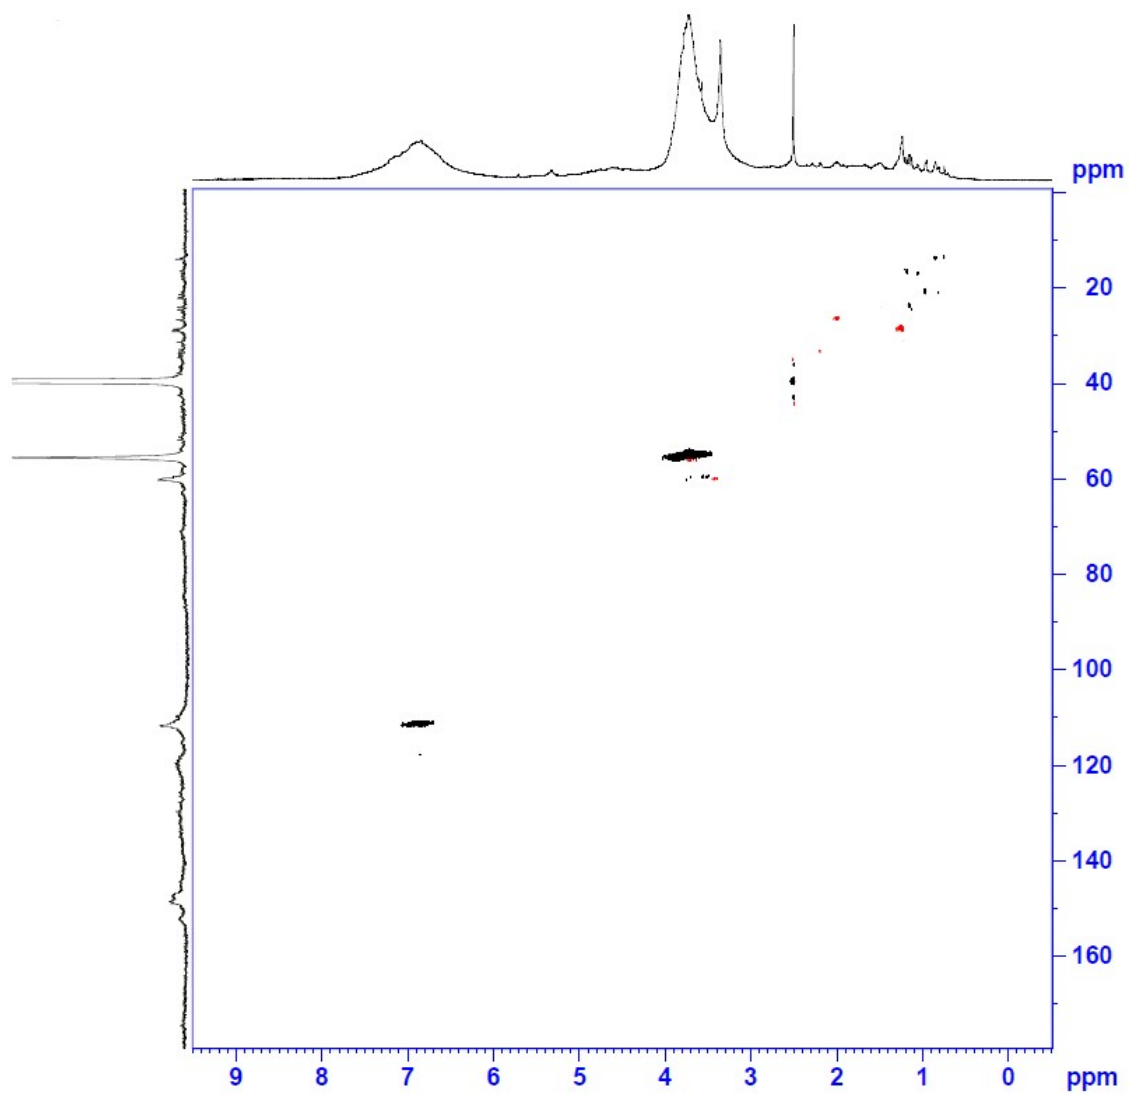

Figure S13. HSQC NMR spectra of methylated SKL.

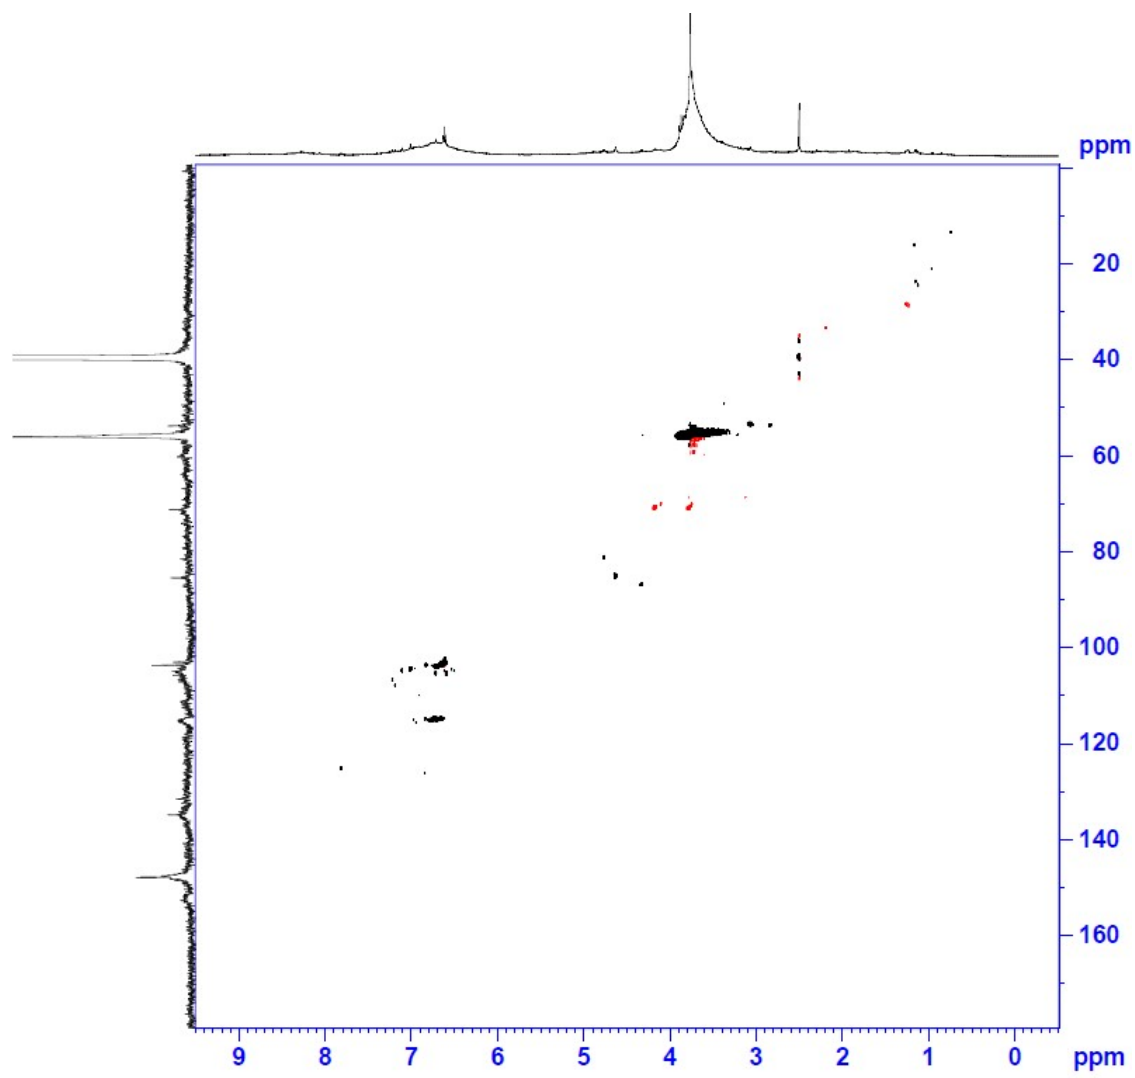

Figure S14. HSQC NMR spectra of HKL.

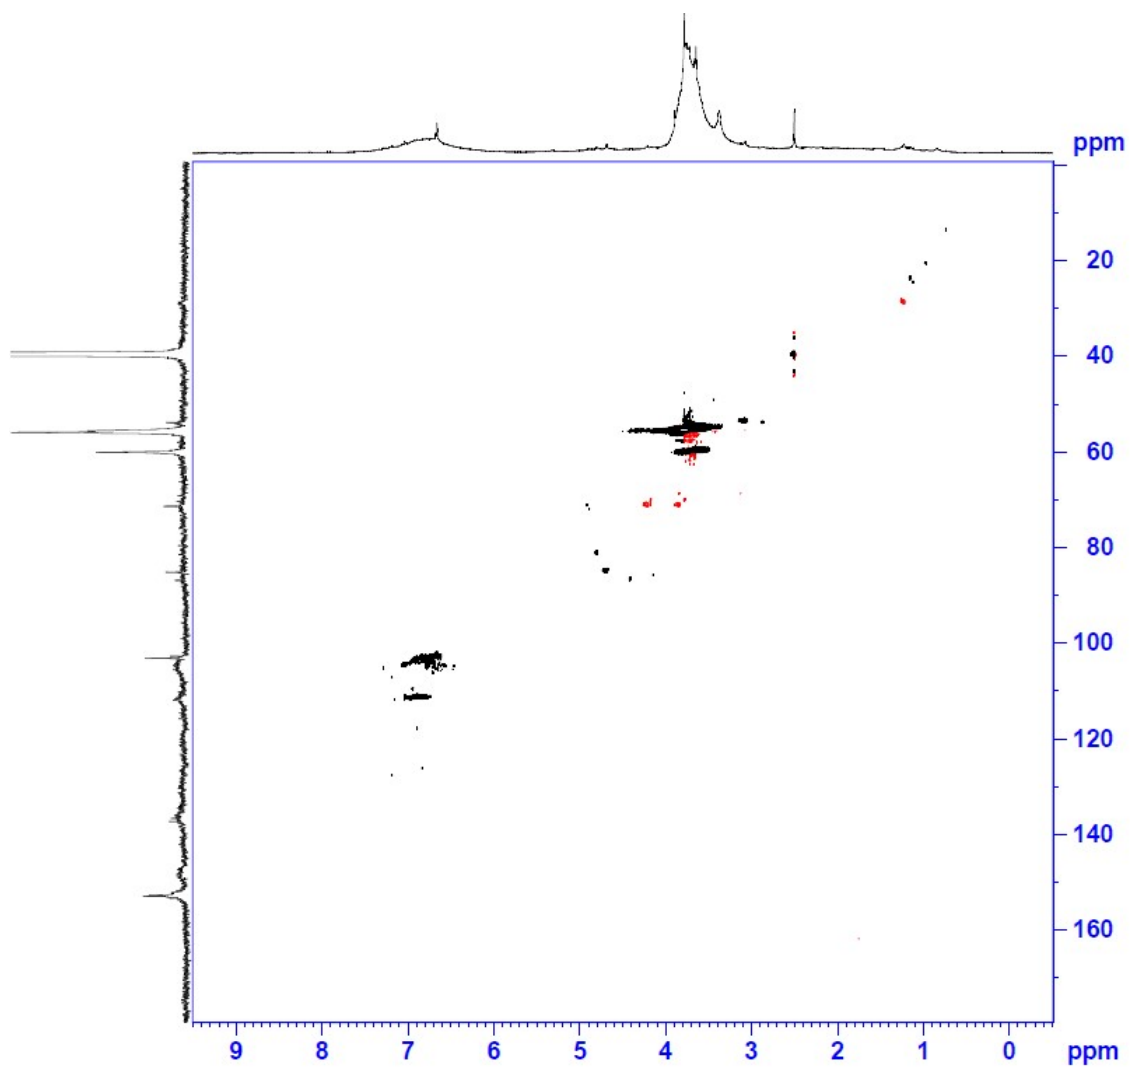

**Figure S15.** HSQC NMR spectra of methylated HKL.

## 7 FTIR spectra

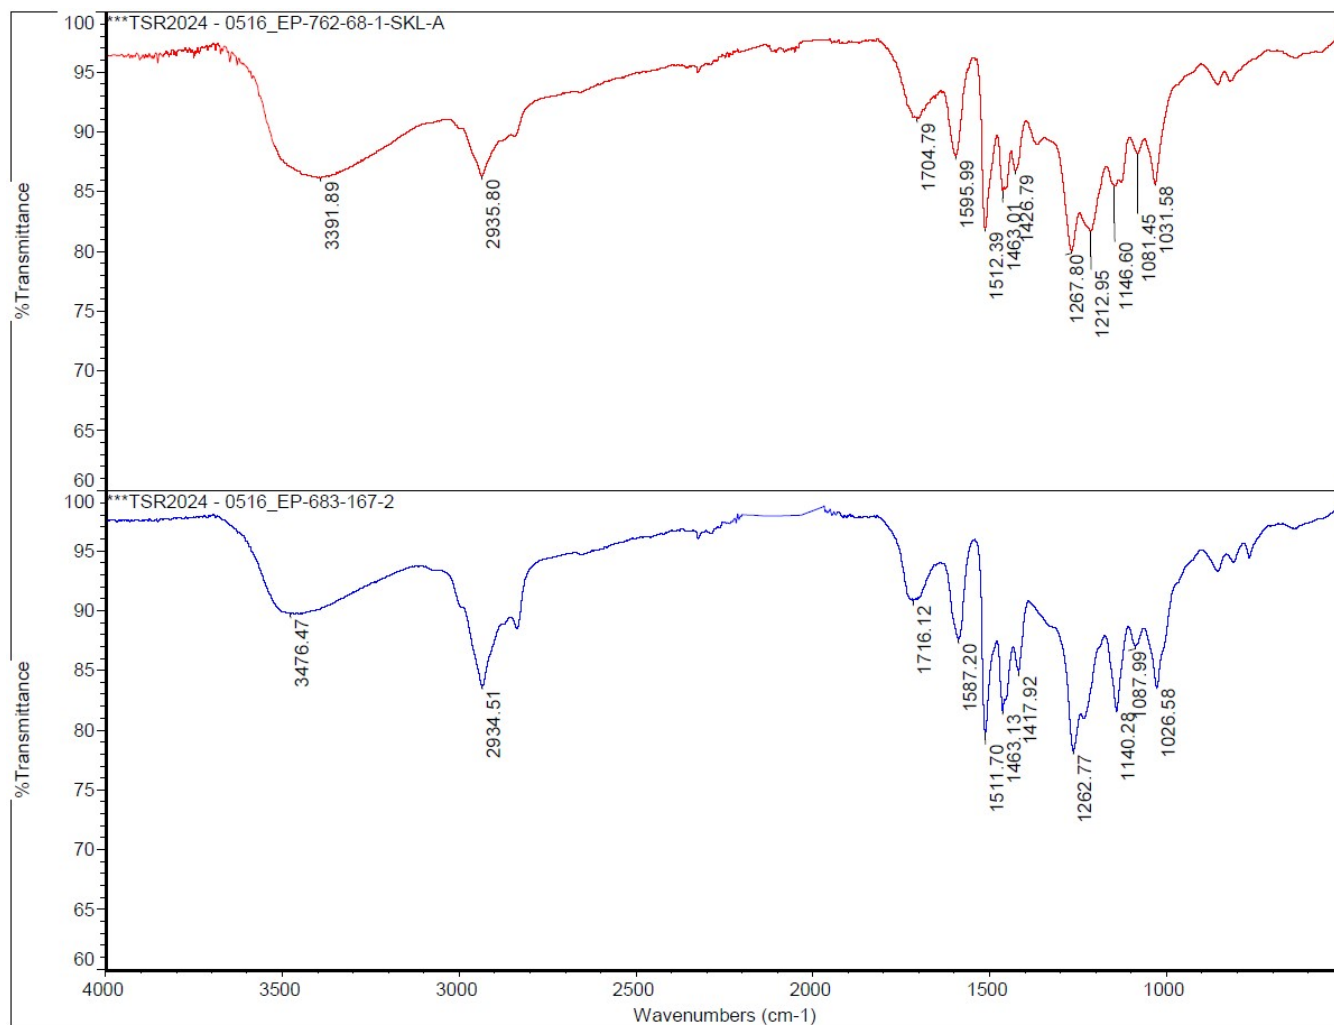

**Figure S16.** FTIR spectra of SKL (red) and of methylated SKL (blue).

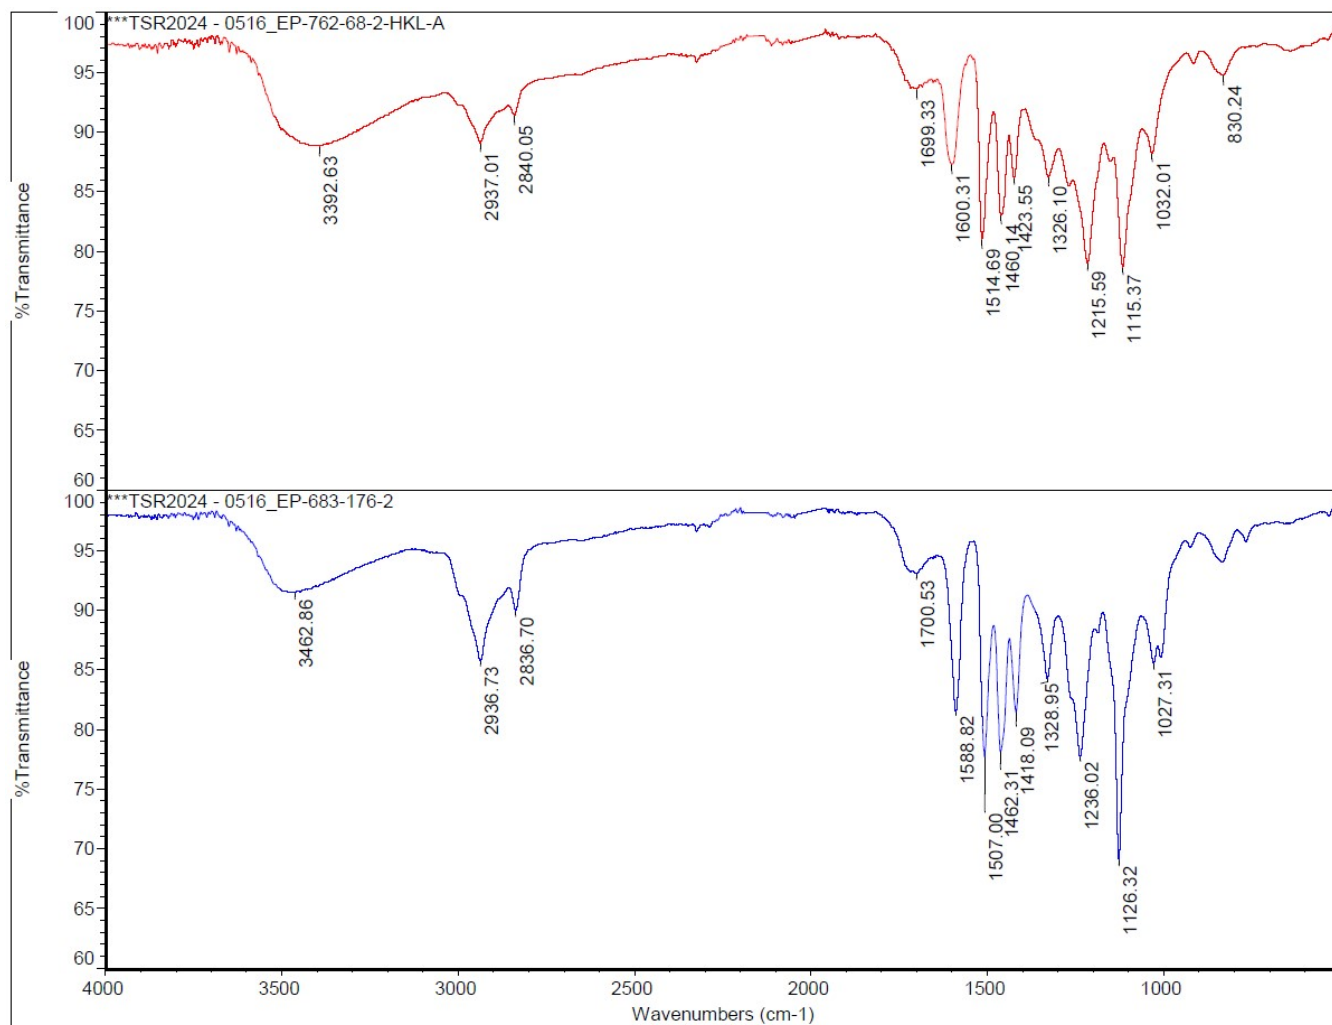

Figure S17. FTIR spectra of HKL (red) and of methylated HKL (blue).
